# Supplementary material
Source: PubMed Central journal article supplement (PMC2330318)
Supplement: plntphys_pp.107.111815_1.pdf [file plntphys_pp.107.111815_1.pdf]

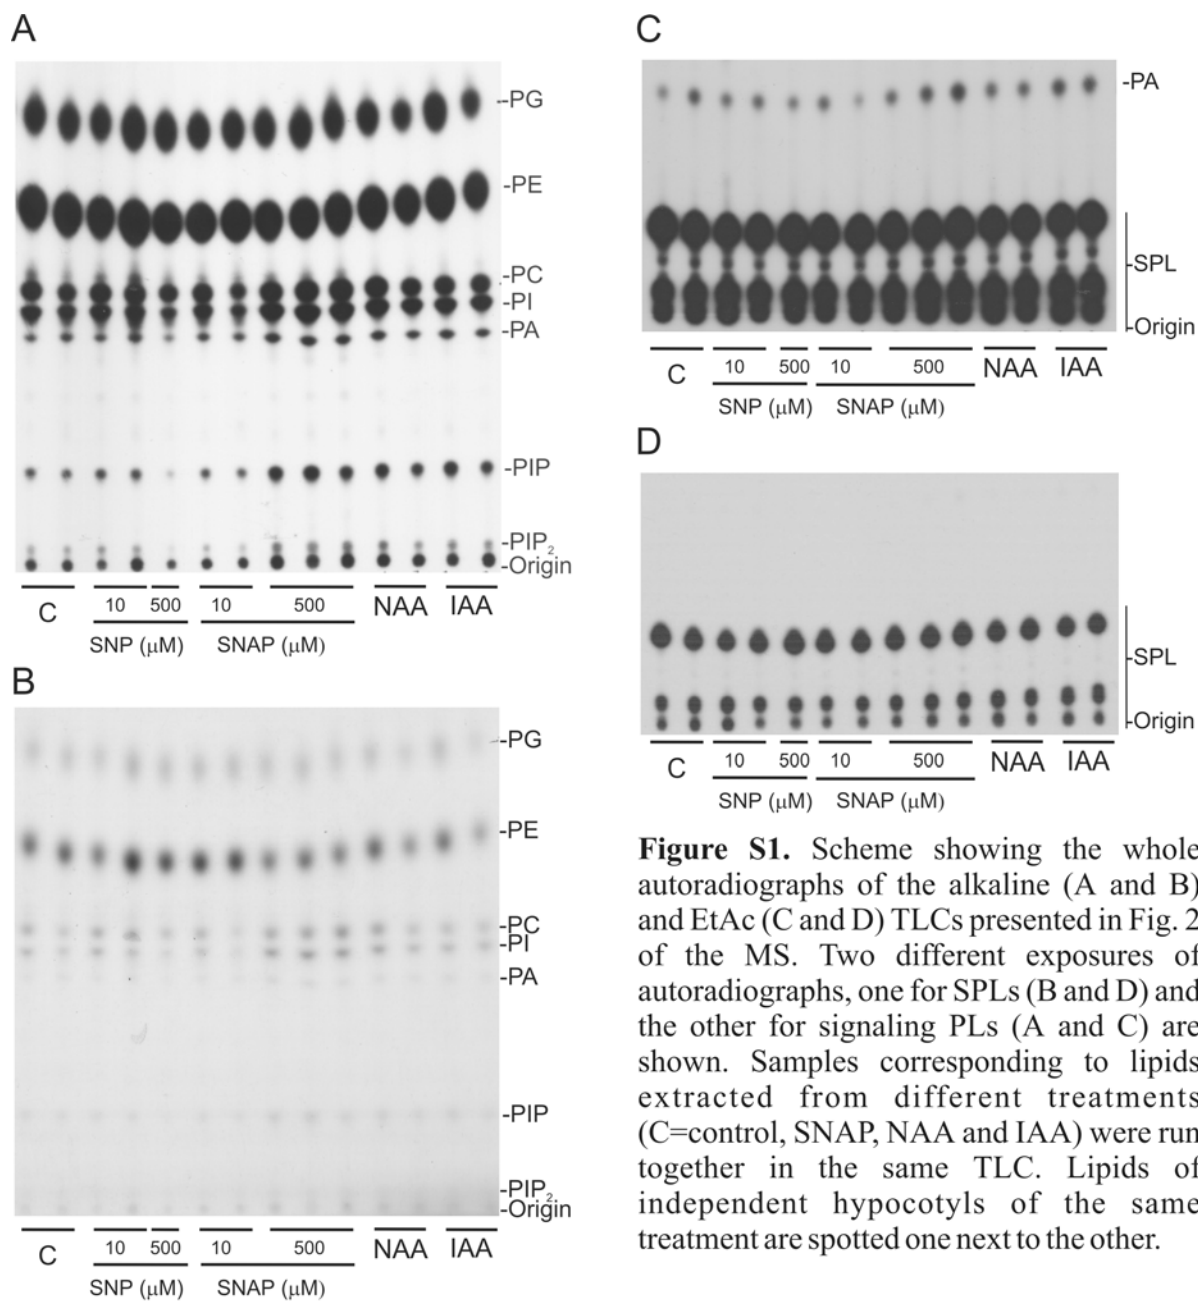

**Figure S1.** Scheme showing the whole autoradiographs of the alkaline (A and B) and EtAc (C and D) TLCs presented in Fig. 2 of the MS. Two different exposures of autoradiographs, one for SPLs (B and D) and the other for signaling PLs (A and C) are shown. Samples corresponding to lipids extracted from different treatments (C=control, SNAP, NAA and IAA) were run together in the same TLC. Lipids of independent hypocotyls of the same treatment are spotted one next to the other.
