# Supplementary material
Source: PubMed Central journal article supplement (PMC2330318)
Supplement: plntphys_pp.107.111815_2.pdf [file plntphys_pp.107.111815_2.pdf]

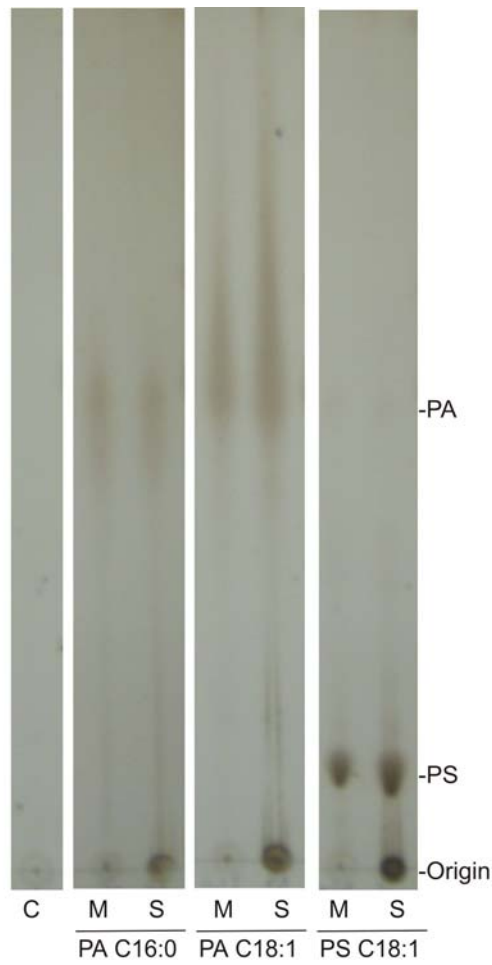

**Figure S2.** Detection of lipids extracted from the medium after 1 h of treatment by charring. Cucumber explants were treated for 1 h at 25°C with buffer (C=control) or with buffer plus 100  $\mu$ M PA C16:0, PA C18:1 or PS C18:1. Lipids were extracted from the medium (M) and separated by EtAc TLC. The same amount of each lipid is spotted on the TLC as standard (S).
